# Supplementary material for: Formation and structure of slightly anionically charged nanoemulsions obtained by the phase inversion concentration (PIC) method
Source: Royal Society of Chemistry journal article supplement (doi:10.1039/c0sm01556c), 2011-01-01
Supplement: c0sm01556c.pdf [file c0sm01556c.pdf]

## Supporting Information

# **Formation and structure of slightly anionically charged nanoemulsions obtained by the phase inversion concentration (PIC) method**

**Peggy Heunemann,<sup>\*a,b</sup> Sylvain Prévost,<sup>a,c</sup> Isabelle Grillo,<sup>b</sup> Christina Michelina Marino,<sup>d</sup>  
Jürgen Meyer<sup>e</sup> and Michael Gradzielski<sup>a</sup>**

<sup>a</sup>Stranski-Laboratorium für Physikalische und Theoretische Chemie, Institut für Chemie, Technische Universität Berlin, D-10623 Berlin, Germany

<sup>b</sup>Institut Max von Laue-Paul Langevin (ILL), F-38042 Grenoble Cedex 9, France

<sup>c</sup>Helmholtz-Zentrum Berlin für Materialien und Energie GmbH, D-14109 Berlin, Germany

<sup>d</sup>Department of Chemical Engineering, University of Delaware, DE-19716 Newark, USA

<sup>e</sup>Evonik Goldschmidt GmbH, D-45127 Essen, Germany

## Table of Contents

S1: Long-time turbidity measurements

S2: UV/Vis-Transmittance measurements – curves

S3: UV/Vis-Transmittance measurements – radii

S4: SANS measurements – Scattering curves (lower phases)

S5: SANS measurements – Teubner Strey analysis (upper phases)

S6: SANS measurements – Teubner Strey analysis (lower phases)

S7: SANS measurements – Residuals for monomodal and bimodal data analyses

S8: SANS measurements – Number weighted radii

## Long-time turbidity measurements:

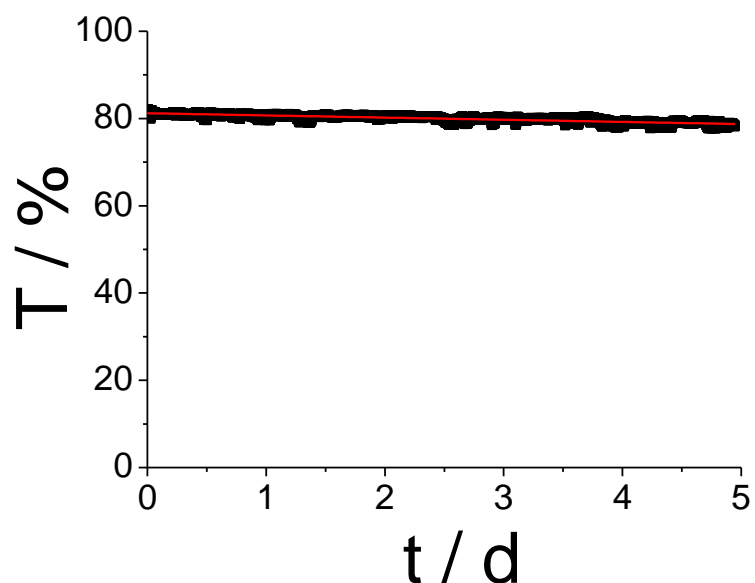

**S1:** Transmittance (T) of an o/w-nanoemulsion (95% H<sub>2</sub>O) was measured at  $25.0 \pm 0.1^\circ\text{C}$  and 633 nm time-dependently for five days. Measurement was done using an in-house transmittance-setup; built-on a 4 mW He-Ne-Laser, a thermostated sample holder and a PH100-Si photodetector (Gentec-E0) connected to a Gentec-E0 SOLO PE Laser Power & Energy meter. No significant structural changes (decrease of transmittance  $T \sim 1.5\%$  per day) could be observed during our typical experimental time window of 2-5 days.

## UV/Vis-Transmittance measurements:

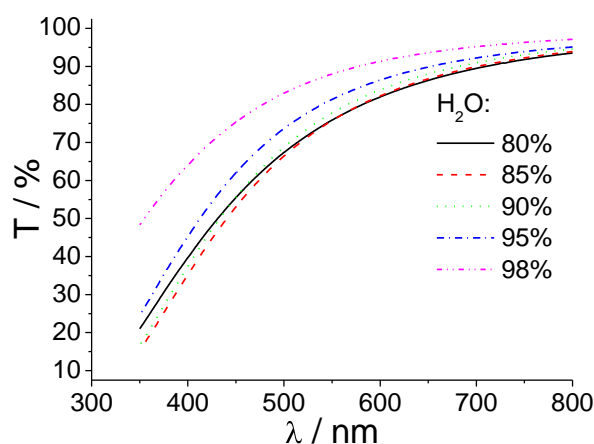

**S2:** UV/Vis-transmittance spectra for oil/water solutions in the nanoemulsion region (> 75% H<sub>2</sub>O) using 0.5 mm cells at  $25.0 \pm 0.1^\circ\text{C}$

| oil | H <sub>2</sub> O | 800 nm |      | 700 nm |      | 626 nm |      |
|-----|------------------|--------|------|--------|------|--------|------|
|     |                  | T      | R    | T      | R    | T      | R    |
| %   | %                | %      | nm   | %      | nm   | %      | nm   |
| 20  | 80               | 97.1   | 14.5 | 95.1   | 14.6 | 92.5   | 14.5 |
| 15  | 85               | 91.7   | 23.7 | 86.7   | 23.4 | 80.2   | 23.3 |
| 10  | 90               | 91.0   | 28.4 | 85.2   | 28.4 | 77.6   | 28.5 |
| 5   | 95               | 93.5   | 32.3 | 89.3   | 32.1 | 83.8   | 32.1 |
| 2   | 98               | 96.0   | 39.3 | 93.5   | 38.9 | 90.1   | 38.7 |

  

| 600 nm |      | 500 nm |      | 400 nm |      | 350 nm |      |
|--------|------|--------|------|--------|------|--------|------|
| T      | R    | T      | R    | T      | R    | T      | R    |
| %      | nm   | %      | nm   | %      | nm   | %      | nm   |
| 91.2   | 14.5 | 82.7   | 14.5 | 60.8   | 14.8 | 39.1   | 15.3 |
| 77.1   | 23.3 | 58.5   | 23.2 | 26.7   | 23.3 | 10.2   | 23.4 |
| 74.0   | 28.5 | 53.0   | 28.7 | 20.3   | 29.0 | 6.58   | 29.0 |
| 81.1   | 32.1 | 64.4   | 32.3 | 33.6   | 32.4 | 16.1   | 32.2 |
| 88.5   | 38.6 | 78.2   | 38.2 | 56.7   | 37.5 | 40.1   | 36.8 |

**S3:** Values of approximated particle size R for o/w-nanoemulsions (> 75wt-% H<sub>2</sub>O), calculated from the transmittances obtained by UV/Vis measurements (fig. S2)

### SANS measurements – Scattering curves (lower phases):

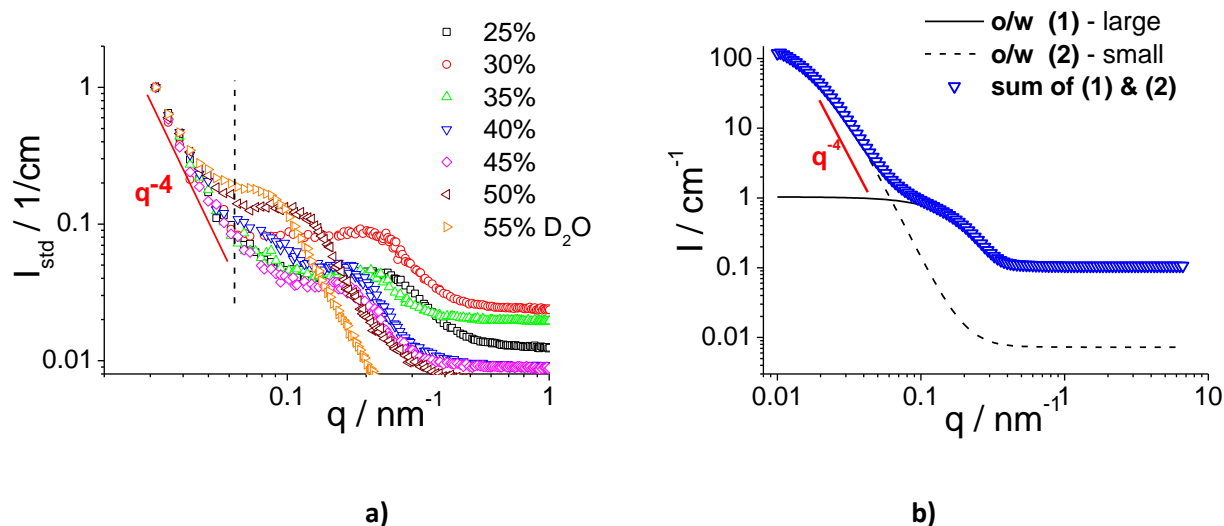

**S4: a)** lower (eg. Fig. 8) scattering curves have been normalised to a maximum intensity of 1 cm<sup>-1</sup> respectively; **b)** theoretical simulation (polydisperse Log-normal distributed spherical model) of a scattering curve consisting of two populations (large and small o/w droplets), observed  $q^{-4}$  dependence in Porod regime evidences assumptions of small o/w-droplets in the lower phase with bigger dispersed oddments of upper one

SANS measurements – Teubner Strey analysis (upper phases):

| H <sub>2</sub> O | Chi-   | c0     | c2                 | V                   | a2       | c1                 | ξi   | Ds   | fa     |
|------------------|--------|--------|--------------------|---------------------|----------|--------------------|------|------|--------|
| %                | Sqr    | [1/cm] | [nm <sup>4</sup> ] | [ nm <sup>3</sup> ] | [ ]      | [nm <sup>2</sup> ] | [nm] | [nm] | [ ]    |
| 5                | 0.9990 | 0.89   | 201                | 66979               | 11.2     | 0.778              | 2.90 | 18.4 | 0.008  |
| 10               | 0.9994 | 0.92   | 2.30E+06           | 104401              | 52959    | -219444            | 4.38 | 19.9 | -0.314 |
| 15               | 0.9995 | 0.95   | 1.86E+06           | 124125              | 24368    | -185291            | 5.56 | 21.9 | -0.435 |
| 20               | 0.9991 | 0.98   | 502                | 136081              | 4.05     | -46.1              | 6.75 | 24.1 | -0.511 |
| 25               | 0.9991 | 0.98   | 14036              | 137582              | 73.6     | -1153              | 7.99 | 26.4 | -0.567 |
| 30               | 0.9988 | 1.01   | 240886             | 139747              | 846      | -17309             | 9.26 | 28.8 | -0.606 |
| 35               | 0.9986 | 1.03   | 223197             | 136090              | 493      | -13308             | 10.8 | 32.1 | -0.634 |
| 40               | 0.9978 | 1.06   | 253                | 136936              | 0.356    | -12.2              | 12.3 | 35.8 | -0.645 |
| 50               | 0.9966 | 1.12   | 1.39E+07           | 148370              | 12285    | -541774            | 14.0 | 40.1 | -0.655 |
| 55               | 0.9913 | 1.04   | 3.01E+07           | 127838              | 7912     | -581632            | 17.5 | 55.3 | -0.595 |
| 60               | 0.9897 | 0.75   | 3.82E+08           | 112835              | 44164    | -3.30E+06          | 17.6 | 72.4 | -0.402 |
| 65               | 0.9884 | 0.58   | 4.22E+12           | 96696               | 2.86E+08 | -1.91E+10          | 18.3 | 86.7 | -0.275 |
| 70               | 0.9888 | 0.29   | 1.43E+12           | 15233               | 6.15E+07 | -9.35E+09          | 24.7 | 89.6 | -0.499 |
| 75               | 0.9894 | 0.38   | 2.22E+08           | 41363               | 11560    | -2.17E+06          | 29.3 | 80.7 | -0.678 |
| 80               | 0.9853 | 0.29   | 3.58E+07           | 23764               | 1641     | -395349            | 40.0 | 80.2 | -0.815 |
| 85               | 0.9984 | 0.20   | 4.67E+14           | 44763               | 2.22E+10 | -2.95E+12          | 23.1 | 88.6 | -0.458 |
| 90               | 0.9997 | 0.15   | 8.06E+18           | 41306               | 2.17E+14 | 1.32E+16           | 18.2 | 134  | 0.158  |
| 95               | 0.9994 | 0.08   | 1.04E+08           | 12109               | 344      | 80457              | 30.1 | 235  | 0.213  |
| 98               | 0.9996 | 0.05   | 3.88E+08           | 4057                | 654      | 123223             | 37.1 | 263  | 0.122  |

**S5:** Obtained Teubner-Strey parameters for upper phases of SANS-data treatment using eq. 9-14; scattering length density difference between oil and water was calculated for oil dominated samples as  $6.37 \cdot 10^{-4} \text{ nm}^{-2}$  ( $5 < x < 40\text{wt-\% H}_2\text{O}$ ) and for water dominated samples as  $6.06 \cdot 10^{-4} \text{ nm}^{-2}$  ( $50 < x < 98\text{wt-\% H}_2\text{O}$ );  $a_2$ ,  $c_1$  and  $c_2$  are coefficients of various terms of order parameters in Landau free energy. In the case of a microemulsion,  $c_1$  indicates the tendency of forming interfaces between different domains and is usually negative, whereas a positive  $a_2$  favours the microemulsion formation. For a stable morphology the criteria of  $4a_2c_2 - c_1 > 0$  with a positive  $c_2$  is required<sup>1</sup>;  $fa$  is the amphiphilicity factor and reaches from 1 for a completely disordered solution to -1 for a superlattice which assumes in case of microemulsions a lamellar structure.

## SANS measurements – Teubner Strey analysis (lower phases):

| H <sub>2</sub> O<br>% | Chi-<br>Sqr | c0<br>[1/cm] | c2<br>[nm <sup>4</sup> ] | V<br>[ nm <sup>3</sup> ] | a2<br>[ ] | c1<br>[nm <sup>2</sup> ] | ξi<br>[nm] | Ds<br>[nm] | fa<br>[ ] |
|-----------------------|-------------|--------------|--------------------------|--------------------------|-----------|--------------------------|------------|------------|-----------|
| 25                    | 0.9956      | 0.18         | 8180                     | 175                      | 43.2      | -633                     | 7.67       | 26.6       | -0.532    |
| 30                    | 0.9904      | 0.15         | 1.02E+06                 | 95.7                     | 3485      | -67869                   | 8.91       | 29.3       | -0.570    |
| 35                    | 0.9665      | 0.13         | 360280                   | 18.5                     | 802       | -23941                   | 12.0       | 31.3       | -0.704    |
| 40                    | 0.9921      | 0.12         | 2.09E+06                 | 26.9                     | 2301      | -100109                  | 14.7       | 37.2       | -0.722    |
| 50                    | 0.9863      | 0.11         | 5.07E+06                 | 14.7                     | 5002      | -230924                  | 15.2       | 38.2       | -0.725    |
| 55                    | 0.9976      | 0.09         | 5.58E+15                 | 22.3                     | 1.16E+12  | -9.37E+13                | 18.2       | 58.8       | -0.583    |
| 60                    | 0.9989      | 0.07         | 5.42E+07                 | 76.6                     | 3856      | -498566                  | 22.8       | 77.8       | -0.545    |
| 65                    | 0.9651      | 0.34         | 7.61E+07                 | 9765                     | 4379      | -1.03E+06                | 50.4       | 74.1       | -0.896    |
| 75                    | 0.9863      | 0.33         | 1.02E+08                 | 30108                    | 3744      | -883937                  | 34.0       | 87.2       | -0.715    |

**S6:** Obtained Teubner-Strey parameters for lower phases of SANS-data treatment using eq. 9-14; scattering length density difference between oil and water was calculated for water dominated samples as  $6.06 \cdot 10^{-4} \text{ nm}^{-2}$  ( $5 < x < 98\text{wt-\% H}_2\text{O}$ );  $a_2$ ,  $c_1$  and  $c_2$  are coefficients of various terms of order parameters in Landau free energy. In the case of a microemulsion,  $c_1$  indicates the tendency of forming interfaces between different domains and is usually negative, whereas a positive  $a_2$  favours the microemulsion formation. For a stable morphology the criteria of  $4a_2c_2 - c_1 > 0$  with a positive  $c_2$  is required<sup>1</sup>;  $fa$  is the amphiphilicity factor and reaches from 1 for a completely disordered solution to -1 for a superlattice which assumes in case of microemulsions a lamellar structure.

## SANS measurements–Residuals for mono- and bimodal data analyses

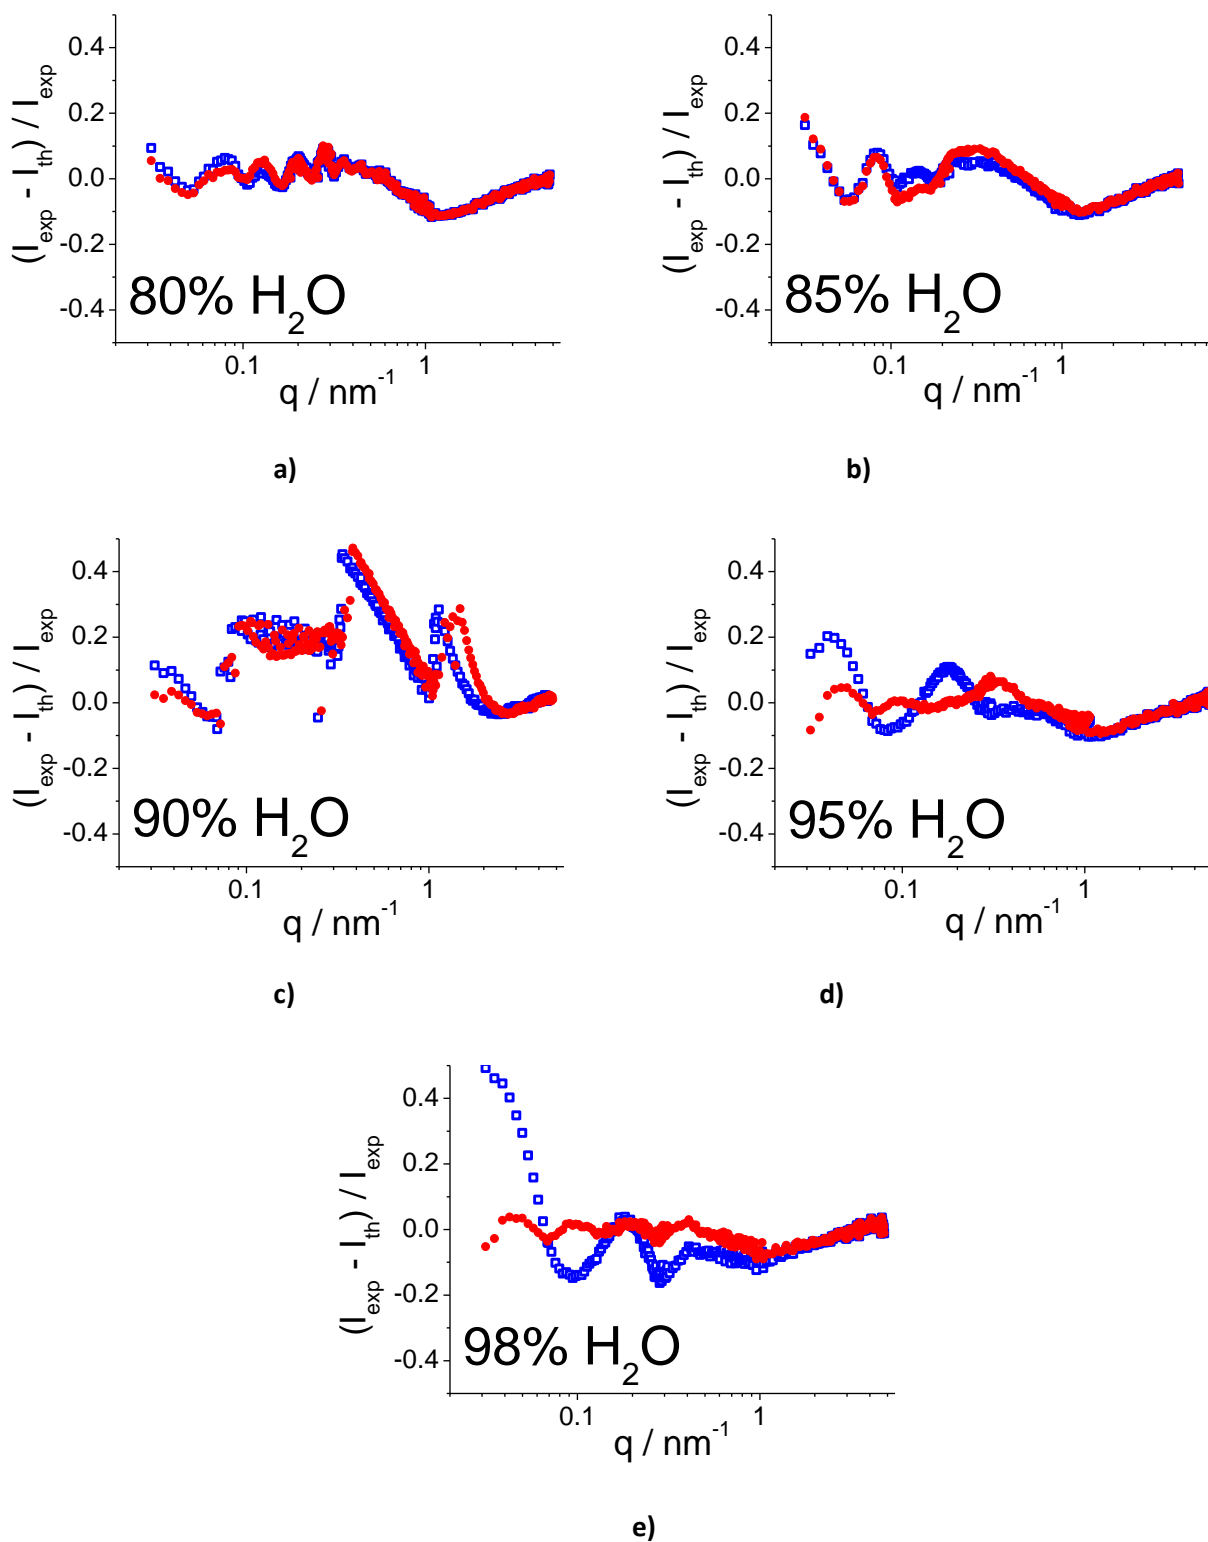

**S7:** Residue of SANS-data fits with  $\square$  monomodal and  $\bullet$  bimodal size distributions for spherical o/w-nanoemulsion droplets (water conc. > 75% a-e)

## SANS measurements – number weighted radii:

| wt(D <sub>2</sub> O) | R <sub>1,N</sub> | R <sub>2,N</sub> | R <sub>1,Mw</sub> | R <sub>2,Mw</sub> |
|----------------------|------------------|------------------|-------------------|-------------------|
| %                    | nm               | nm               | nm                | nm                |
| 80                   | 9.71             | 25.3             | 12.7              | 31.6              |
| 85                   | 11.1             | 25.6             | 14.3              | 32.0              |
| 90                   | 11.6             | 26.0             | 14.8              | 32.8              |
| 95                   | 12.2             | 27.0             | 15.4              | 35.6              |
| 98                   | 12.7             | 29.1             | 16.0              | 39.4              |

**S8:** Number-weighted (N) and mass weighted (Mw) radii R of population R<sub>1</sub> and population R<sub>2</sub> using Log normal distributed spherical model for two populations

Mass weighted radii  $\langle R \rangle_{Mw}$  are accessible via the first four moments of distribution function f(R). Detailed information about its calculation and the four moments of most widely used distributions can be found elsewhere<sup>2</sup>.

$$\langle R \rangle_{Mw} = \frac{\int R \cdot R^3 \cdot f(R) dR}{\int R^3 \cdot f(R) dR} \quad (i)$$

<sup>1</sup> M. Teubner, R. Strey, *J. Chem. Phys.* **1987**, 87, 3195-3200

<sup>2</sup> Y.D. Yan, J.H.R. Clarke, *Adv. Colloid Interface Sci.* **1989**, 29, 277-318
